# Supplementary material
Source: PubMed Central journal article supplement (PMC2717865)
Supplement: en.2008-1613_1.pdf [file en.2008-1613_1.pdf]

**Supplementary Table I. Peptides generated in the catestatin region of CgA by CTSL.**

Purified WT recombinant CgA (10  $\mu$ M) was digested with 0.3  $\mu$ M CTSL for 15 min and was analyzed by LC-MS/MS.

| Observed mass | Calculated mass | Residues of CgA | Sequence                      | C.I.%  |
|---------------|-----------------|-----------------|-------------------------------|--------|
| 1596.6178     | 1596.6443       | 343-355         | G_QEEEEEDNRDSSMK_L            | 100    |
| 1653.6373     | 1653.6656       | 342-355         | E_GQEEEEEDNRDSSMK_L           | 99.992 |
| 1675.7177     | 1675.7405       | 336-349         | T_AEKRLEGQEEEEEDN_R           | 99.885 |
| 1766.7184     | 1766.7498       | 342-356         | E_GQEEEEEDNRDSSMKL_S          | 99.998 |
| 1779.712      | 1779.7338       | 343-357         | G_QEEEEEDNRDSSMKLS_F          | 99.994 |
| 1853.7485     | 1853.7817       | 342-357         | E_GQEEEEEDNRDSSMKLS_F         | 99.974 |
| 1946.8401     | 1946.8685       | 336-351         | T_AEKRLEGQEEEEEDNRD_S         | 99.995 |
| 2000.8516     | 2000.8502       | 342-358         | E_GQEEEEEDNRDSSMKLSF_R        | 99.903 |
| 2082.8867     | 2082.9033       | 343-359         | G_QEEEEEDNRDSSMKLSFR_A        | 100    |
| 2156.9553     | 2156.9512       | 342-359         | E_GQEEEEEDNRDSSMKLSFR_A       | 100    |
| 2380.051      | 2380.0681       | 336-355         | T_AEKRLEGQEEEEEDNRDSSMK_L     | 100    |
| 2580.1582     | 2580.1841       | 336-357         | T_AEKRLEGQEEEEEDNRDSSMKLS_F   | 99.999 |
| 2851.2996     | 2851.3374       | 332-355         | A_KELTAEKRLEGQEEEEEDNRDSSMK_L | 99.992 |
