# Supplementary material
Source: PubMed Central journal article supplement (PMC2717865)
Supplement: en.2008-1613_2.pdf [file en.2008-1613_2.pdf]

**Supplementary Table II.** Purified wild-type CgA (10  $\mu$ M/reaction) was digested with 0.3  $\mu$ M of CTSL for 15 min at 30 °C and was analyzed by LC-MS/MS. Peptides generated in pancreastatin, (IIA) vasostatin (IIB), WE14 (IIC), GE25 (IID) and chromacin (IIE) region were listed in the following Tables.

**IIA. Peptides generated in the pancreastatin region of CgA by CTSL.**

| Observed mass | Calculated mass | Residues of CgA | Sequence                        | C.I. % |
|---------------|-----------------|-----------------|---------------------------------|--------|
| 1047.5297     | 1047.5428       | 249-258         | R_KGESRSEALA_V                  | 99.977 |
| 1125.5963     | 1125.6051       | 236-245         | V_LNPHPSLGYK_E                  | 100    |
| 1246.6415     | 1246.6613       | 290-300         | E_EMAVVPQGLFR_G                 | 98.901 |
| 1261.627      | 1261.6495       | 246-256         | K_EIRKGESRSEA_L                 | 99.719 |
| 1375.6854     | 1375.7039       | 289-300         | E_EEMAVVPQGLFR_G                | 99.984 |
| 1445.7471     | 1445.7706       | 246-258         | K_EIRKGESRSEALA_V               | 99.262 |
| 1504.7227     | 1504.7465       | 288-300         | E_EEEMAVVPQGLFR_G               | 100    |
| 1762.8403     | 1762.8315       | 286-300         | K_EEEEEEMAVVPQGLFR_G            | 99.6   |
| 3225.387      | 3225.5117       | 273-300         | D_PEGKGEQEHSQKKEEEEMAVVPQGLFR_G | 100    |

**IIB. Peptides generated in the vasostatin region of CgA.**

| Observed mass | Calculated mass | Residues of CgA | Sequence                 | C.I. % |
|---------------|-----------------|-----------------|--------------------------|--------|
| 1071.5062     | 1071.5217       | 75-83           | H_QQKKHSGFE_D            | 99.787 |
| 1072.6119     | 1072.611        | 41-49           | E_TLRGDERIL_S            | 99.718 |
| 1133.5239     | 1133.5433       | 92-101          | E_NQSSQAEELKE_A          | 100    |
| 1133.5299     | 1133.5433       | 91-100          | L_ENQSSQAEELK_E          | 99.999 |
| 1474.7225     | 1474.7384       | 88-100          | S_EVLENQSSQAEELK_E       | 100    |
| 1780.8912     | 1780.9202       | 69-83           | G_AKERAHQQKKHSGFE_D      | 99.961 |
| 1837.9149     | 1837.9415       | 68-83           | Q_GAKERAHQQKKHSGFE_D     | 100    |
| 1918.8783     | 1918.924        | 84-100          | E_DELSEVLENQSSQAEELK_E   | 100    |
| 1948.943      | 1948.9736       | 67-83           | L_QGAKERAHQQKKHSGFE_D    | 99.327 |
| 2047.9384     | 2047.9666       | 84-101          | E_DELSEVLENQSSQAEELKE_A  | 100    |
| 2282.092      | 2282.1272       | 68-87           | Q_GAKERAHQQKKHSGFEDELS_E | 100    |

**IIC. Peptides generated in the WE14 region of CgA by CTSL.**

| Observed mass | Calculated mass | Residues of CgA | Sequence             | C.I.%  |
|---------------|-----------------|-----------------|----------------------|--------|
| 1176.6328     | 1176.6293       | 326-335         | S_KMDQLAKELT_A       | 100    |
| 1216.6766     | 1216.6896       | 332-341         | A_KELTAEKRLE_G       | 99.992 |
| 1263.6355     | 1263.6614       | 325-335         | W_SKMDQLAKELT_A      | 99.999 |
| 1350.6274     | 1350.6437       | 316-325         | S_KEWEDSKRWS_K       | 99.899 |
| 1464.7164     | 1464.7264       | 320-331         | E_DSKRWSKMDQLA_K     | 99.79  |
| 1478.7225     | 1478.7386       | 316-326         | S_KEWEDSKRWSK_M      | 99.988 |
| 1852.849      | 1852.8646       | 316-329         | S_KEWEDSKRWSKMDQ_L   | 99.938 |
| 1902.9889     | 1903.0317       | 326-341         | S_KMDQLAKELTAEKRLE_G | 99.974 |
| 2036.9614     | 2036.9858       | 316-331         | S_KEWEDSKRWSKMDQLA_K | 100    |

**IID. Peptides generated in the GE25 region of CgA by CTSL.**

| Observed mass | Calculated mass | Residues of CgA | Sequence                  | C.I. % |
|---------------|-----------------|-----------------|---------------------------|--------|
| 1418.6465     | 1418.6659       | 375-386         | R_GWRPSSREDSLE_A          | 99.94  |
| 1574.7511     | 1574.767        | 374-386         | R_RGWRPSSREDSLE_A         | 99.409 |
| 1997.9578     | 1998.0039       | 375-392         | R_GWRPSSREDSLEAGLPLQ_V    | 99.342 |
| 2409.2031     | 2409.2744       | 374-394         | R_RGWRPSSREDSLEAGLPLQVR_G | 99.98  |

**IIIE. Peptides generated in the chromacin region of CgA.**

| Observed mass | Calculated mass | Residues of CgA | Sequence                        | C.I. % |
|---------------|-----------------|-----------------|---------------------------------|--------|
| 1674.8568     | 1674.8656       | 185-200         | D_SEGLSQGLVDREKGLS_A            | 99.8   |
| 2175.0298     | 2175.02         | 174-194         | S_QKYPGPQAEGDSEGLSQGLVD_R       | 100    |
| 2628.2312     | 2628.2537       | 174-198         | S_QKYPGPQAEGDSEGLSQGLVDREKG_L   | 100    |
| 2845.3347     | 2845.3962       | 174-200         | S_QKYPGPQAEGDSEGLSQGLVDREKGLS_A | 100    |
